# Supplementary material for: Lactiplantibacillus plantarumCCFM1019 attenuate polycystic ovary syndrome through butyrate dependent gut–brain mechanism
Source: Royal Society of Chemistry journal article supplement (doi:10.1039/d1fo01744f), 2022-01-01
Supplement: d1fo01744f1.pdf [file d1fo01744f1.pdf]

## 26 1.4 Morphology and immunohistochemistry

27 After euthanasia, ovaries and colon samples were immediately removed from the animals and  
28 fixed with 4% paraformaldehyde and embedded in paraffin. The ovaries were sectioned at a  
29 thickness of 4–5  $\mu\text{m}$  and stained with haematoxylin and eosin for microscopic examination. The  
30 thickness of the granulosa cell layers was measured using Image Pro Plus 6.0 software (Media  
31 Cybernetics, Rockville).

32 Deparaffinised colon tissue sections were treated with citrate buffer for antigen retrieval and  
33 blocked with 3%  $\text{H}_2\text{O}_2$ . The slides were then blocked using 3% (w/v) bovine serum albumin for  
34 30 min. A rabbit-derived primary antibody, anti-GPR41 (Affinity Biosciences Inc, OH), was used  
35 at a dilution of 1:200. The slides were then incubated with a secondary antibody for 50 min and  
36 stained with diaminobenzidine. They were then counterstained with haematoxylin and cleared  
37 with xylene. Image Pro Plus 6.0 software was used to measure the integrated optical density of the  
38 target protein.

## 39 2. Results

### 40 2.1 Overview of top 25 genera

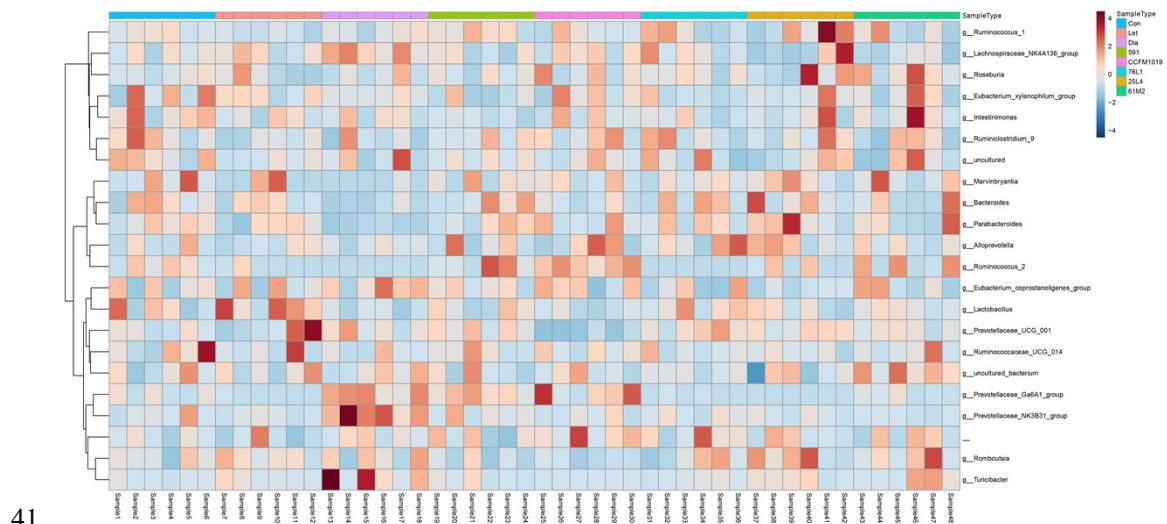

42 Figure S1 Heatmap of the top 25 abundant genera of individual rats. Con: control group; Let: letrozole group; Dia:  
43 Diane-35 group.

### 44 2.2 PICRUST analysis

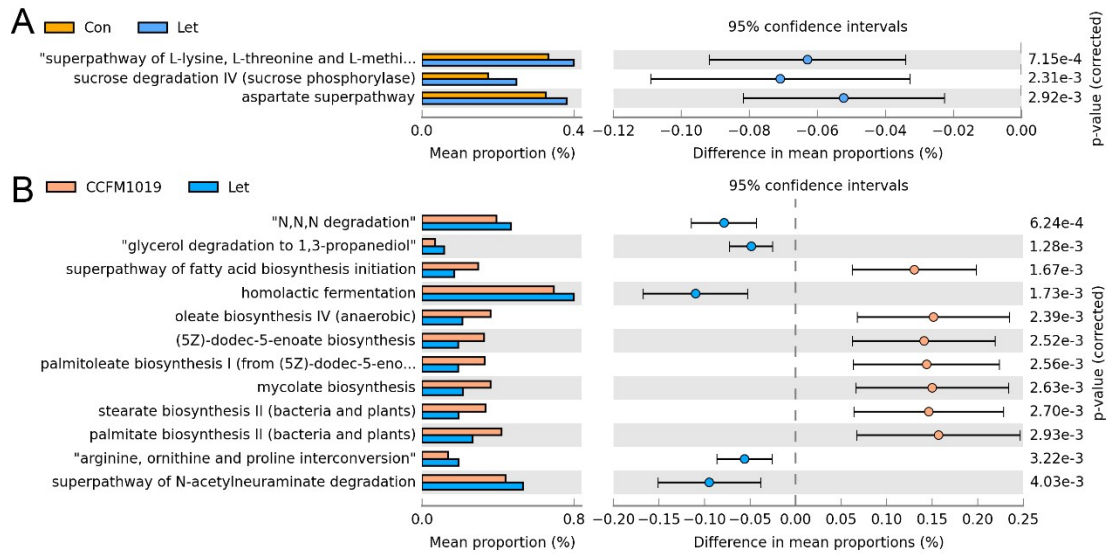

45

46 Figure S2 Differential microbial functions between groups. Phylogenetic Investigation of Communities by

47 Reconstruction of Unobserved States (PICRUSt) was performed based on the Kyoto Encyclopedia of Genes and

48 Genomes (KEGG) database. Con: control group; Let: letrozole group.

#### 49 2.3 Ovary weight

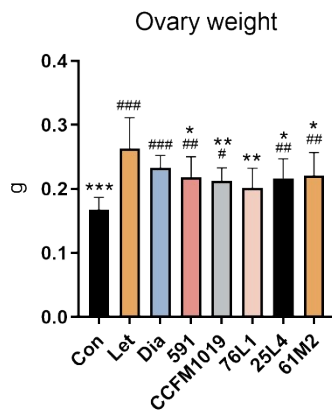

50

51 Figure S3 Ovary weight. Data are means with SD. # $p < 0.05$ , ## $p < 0.01$ , ### $p < 0.001$  versus the control group; \* $p <$

52 0.05, \*\* $p < 0.01$ , \*\*\* $p < 0.001$  versus the letrozole group using a one-way ANOVA (or Kruskal-Wallis test). Con:

53 control group; Let: letrozole group; Dia: Diane-35 group.

#### 54 2.4 PCoA analysis

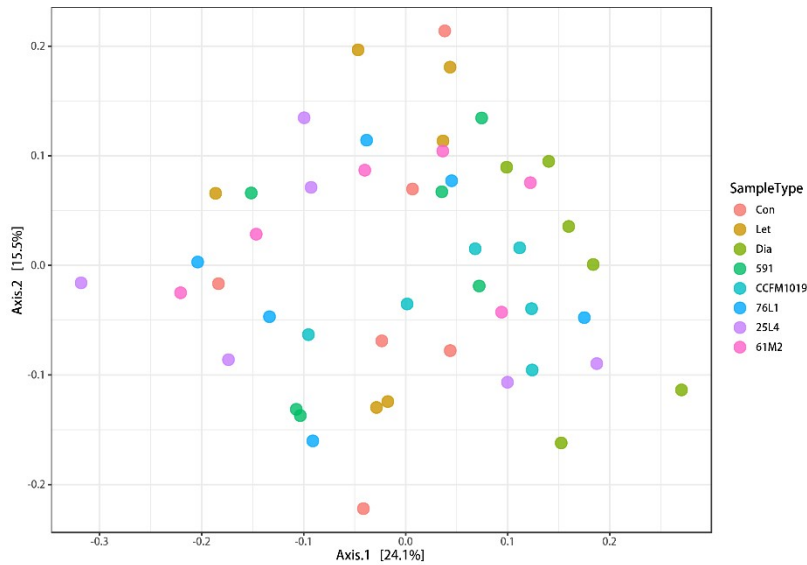

55

56 Figure S4 Principal coordinates analysis (PCoA) using the Bray–Curtis distance. Con: control group; Let: letrozole  
57 group; Dia: Diane-35 group.

## 58 2.5 One-way ANOSIM test of microbiota between experimental groups

59 Table S2 Detailed results of one-way ANOSIM test between experimental groups in PCoA analysis.

| Group    | Con  | Let                      | Dia                      | 591                      | CCFM1019                 | 76L1                     | 25L4                      | 61M2                      |
|----------|------|--------------------------|--------------------------|--------------------------|--------------------------|--------------------------|---------------------------|---------------------------|
| Con      |      | R=0.11<br><i>p</i> =0.15 | R=0.64<br><i>p</i> =0.01 | R=0.02<br><i>p</i> =0.38 | R=0.52<br><i>p</i> =0.01 | R=0.26<br><i>p</i> =0.04 | R=0.27<br><i>p</i> =0.06  | R=0.29<br><i>p</i> =0.02  |
|          | Let  | R=0.11<br><i>p</i> =0.15 |                          | R=0.76<br><i>p</i> =0.01 | R=0.49<br><i>p</i> =0.01 | R=0.82<br><i>p</i> =0.01 | R=0.48<br><i>p</i> =0.01  | R=0.51<br><i>p</i> =0.01  |
| Dia      |      | R=0.64<br><i>p</i> =0.01 | R=0.76<br><i>p</i> =0.01 |                          | R=0.45<br><i>p</i> =0.01 | R=0.42<br><i>p</i> =0.01 | R=0.46<br><i>p</i> =0.01  | R=0.43<br><i>p</i> =0.01  |
|          | 591  | R=0.02<br><i>p</i> =0.38 | R=0.49<br><i>p</i> =0.01 | R=0.45<br><i>p</i> =0.01 |                          | R=0.29<br><i>p</i> =0.02 | R=0.08<br><i>p</i> =0.24  | R=0.14<br><i>p</i> =0.13  |
| CCFM1019 |      | R=0.52<br><i>p</i> =0.01 | R=0.82<br><i>p</i> =0.01 | R=0.42<br><i>p</i> =0.01 | R=0.29<br><i>p</i> =0.02 |                          | R=0.39<br><i>p</i> =0.02  | R=0.28<br><i>p</i> =0.04  |
|          | 76L1 | R=0.26<br><i>p</i> =0.04 | R=0.48<br><i>p</i> =0.01 | R=0.46<br><i>p</i> =0.01 | R=0.08<br><i>p</i> =0.24 | R=0.39<br><i>p</i> =0.02 |                           | R=-0.05<br><i>p</i> =0.57 |
| 25L4     |      | R=0.27<br><i>p</i> =0.06 | R=0.51<br><i>p</i> =0.01 | R=0.43<br><i>p</i> =0.01 | R=0.14<br><i>p</i> =0.13 | R=0.28<br><i>p</i> =0.04 | R=-0.05<br><i>p</i> =0.57 |                           |
|          | 61M2 | R=0.29<br><i>p</i> =0.02 | R=0.57<br><i>p</i> =0.01 | R=0.39<br><i>p</i> =0.01 | R=0.11<br><i>p</i> =0.16 | R=0.20<br><i>p</i> =0.06 | R=0.05<br><i>p</i> =0.34  | R=-0.05<br><i>p</i> =0.61 |

60 Red number indicate significant difference between experimental groups ( $p < 0.05$ ). Con: control group; Let:  
61 letrozole group; Dia: Diane-35 group.

## 62 2.6 16S rDNA sequences of five *Lp. plantarum* strains

63 *Lp. plantarum* 591 (Preservation number: CCFM591)

64 CTATAATGCAGTCGACGAACTCTGGTATTGATTGGTCTTGCATCATGATTTACATTT

65 GAGTGAGTGGCGAACTGGTGAGTAACACGTGGGAAACCTGCCAGAAGCGGGGGAT

66 AACACCTGGAAACAGATGCTAATACCGCATAACAACCTTGGACCGCATGGTCCGAGCT  
67 TGAAAGATGGCTTCGGCTATCACTTTTGGATGGTCCCGCGGCGTATTAGCTAGATGGT  
68 GGGGTAACGGCTCACCATGGCAATGATACGTAGCCGACCTGAGAGGGTAATCGGCCA  
69 CATTGGGACTGAGACACGGCCCAAACCTCCTACGGGAGGCAGCAGTAGGGAATCTTCC  
70 ACAATGGACGAAAGTCTGATGGAGCAACGCCGCGTGAGTGAAGAAGGGTTTCGGCTC  
71 GTAAAACCTCTGTTGTTAAAGAAGAACATATCTGAGAGTAACTGTTTCAGGTATTGACG  
72 GTATTTAACCAGAAAGCCACGGCTAACTACGTGCCAGCAGCCGCGGTAATACGTAGG  
73 TGGCAAGCGTTGTCCGGATTTATTGGGCGTAAAGCGAGCGCAGGCGGTTTTTTAAGTC  
74 TGATGTGAAAGCCTTCGGCTCAACCGAAGAAGTGCATCGGAAACTGGGAAACTTGAG  
75 TGCAGAAGAGGACAGTGGAACCTCCATGTGTAGCGGTGAAATGCGTAGATATATGGAA  
76 GAACACCAGTGGCGAAGGCGGCTGTCTGGTCTGTAACCTGACGCTGAGGCTCGAAAGT  
77 ATGGGTAGCAAACAGGATTAGATACCCTGGTAGTCCATACCGTAAACGATGAATGCT  
78 AAGTGTGGAGGGTTTCCGCCCTTCAGTGCTGCAGCTAACGCATTAAGCATTCCGCCT  
79 GGGGAGTACGGCCGCAAGGCTGAAACTCAAAGGAATTGACGGGGGCCCGCACAAGC  
80 GGTGGAGCATGTGGTTTAATTCGAAGCTACGCGAAGAACCTTACCAGGTCTTGACAT  
81 ACTATGCAAATCTAAGAGATTAGACGTTCCCTTCGGGGACATGGATACAGGTGGTGC  
82 ATGGTTGTCGTCAGCTCGTGTGCGTGAGATGTTGGGTAAAGTCCCGCAACGAGCGCAAC  
83 CCTTATTATCAGTTGCCAGCATTAAAGTTGGGCACTCTGGTGAGACTGCCGGTGACAAA  
84 CCGGAGGAAGGTGGGGATGACGTCAAATCATCATGCCCCTTATGACCTGGGCTACAC  
85 ACGTGCTACAATGGATGGTACAACGAGTTGCGAACTCGCGAGAGTAAGCTAATCTCT  
86 TAAAGCCATTCTCAGTTCGGATTGTAGGCTGCAACTCGCCTACATGAAGTCGGAATCG  
87 CTAGTAATCGCGGATCAGCATGCCGCGGTGAATACGTTCCCGGGCCTGTACACACC  
88 GCCCGTCACACCATGAGAGTTTGTAACACCCAAAGTCGGTGGGGTAACCTTTAGAAC  
89 CAGCCGCTA

90 *Lp. plantarum* CCFM1019 (Preservation number: CCFM1019)

91 CTTAGCGGCTGGTTCTAAAGGTTACCCACCGACTTTGGGTGTTACAACTCTCATGG  
92 TGTGACGGGCGGTGTGTACAAGGCCCGGGAACGTATTCACCGCGGCATGCTGATCCG  
93 CGATTACTAGCGATTCCGACTTCATGTAGGCGAGTTGCAGCCTACAATCCGAACTGAG  
94 AATGGCTTTAAGAGATTAGCTTACTCTCGCGAGTTCGCAACTCGTTGTACCATCCATT  
95 GTAGCACGTGTGTAGCCCAGGTCATAAGGGGCATGATGATTTGACGTCATCCCCACCT

96 TCCTCCGGTTTGTACCCGGCAGTCTCACCAGAGTGCCCAACTTAATGCTGGCAACTGA  
97 TAATAAGGGTTGCGCTCGTTGCGGGACTTAACCCAACATCTCACGACACGAGCTGAC  
98 GACAACCATGCACCACCTGTATCCATGTCCCCGAAGGGAACGTCTAATCTCTTAGATT  
99 TGCATAGTATGTCAAGACCTGGTAAGGTTCTTCGCGTAGCTTCGAATTAACCACATG  
100 CTCCACCGCTTGTGCGGGCCCCGTC AATTCCTTTGAGTTTCAGCCTTGCGGCCGTA  
101 CCCCAGGCGGAATGCTTAATGCGTTAGCTGCAGCACTGAAGGGCGGAAACCCTCCAA  
102 CACTTAGCATTTCATCGTTTACGGTATGGACTACCAGGGTATCTAATCCTGTTTGCTAC  
103 CCATACTTTCGAGCCTCAGCGTCAGTTACAGACCAGACAGCCGCCTTCGCCACTGGTG  
104 TTCTTCCATATATCTACGCATTCACCGCTACACATGGAGTTCCTACTGTCCTCTTCTGC  
105 ACTCAAGTTTCCCAGTTTCCGATGCACTTCTTCGGTTGAGCCGAAGGCTTTCACATCA  
106 GACTTAAAAAACC GCCTGCGCTCGCTTACGCCAATAAATCCGGACAACGCTTGCC  
107 ACCTACGTATTACCGCGGCTGCTGGCACGTAGTTAGCCGTGGCTTCTGGTTAAATAC  
108 CGTCAATACCTGAACAGTTACTCTCAGATATGTTCTTCTTTAACAACAGAGTTTTACG  
109 AGCCGAAACCCTTCTTCACTCACGCGGCGTTGCTCCATCAGACTTTCGTCCATTGTGG  
110 AAGATTCCCTACTGCTGCCTCCCGTAGGAGTTTGGGCCGTGTCTCAGTCCCAATGTGG  
111 CCGATTACCCTCTCAGGTCGGCTACGTATCATTGCCATGGTGAGCCATTACCCACCA  
112 TCTAGCTAATACGCCGCGGGACCATCCAAAAGTGATAGCCGAAGCCATCTTCAAAC  
113 TCGGACCATGCGGTCCAAGTTGTTATGCGGTATTAGCATCTGTTTCCAGGTGTTATCC  
114 CCCGCTTCTGGGCAGGTTTCCCACGTGTTACTCACCAGTTCGCCACTCACTCAAATGT  
115 AAATCATGATGCAAGCACCAATCAATACCAGAGTTCGTGCGACTGCATGATAGA  
116 *Lp. plantarum* 76L1(Preservation number: FSCDJY76L1)  
117 CGGCTGGTTCCTAAAAGGTTACCCACCGACTTTGGGTGTTACAACTCTCATGGTGT  
118 GACGGGCGGTGTGTACAAGGCCCGGGAACGTATTCACCGCGGCATGCTGATCCGCGA  
119 TTAGTAGCGATTCCGACTTCATGTAGGCGAGTTGCAGCCTACAATCCGAACTGAGAAT  
120 GGCTTTAAGAGATTAGCTTACTCTCGCGAGTTCGCAACTCGTTGTACCATCCATTGTA  
121 GCACGTGTGTAGCCCAGGTCATAAGGGGCATGATGATTTGACGTCATCCCCACCTTCC  
122 TCCGTTTGTACCCGGCAGTCTCACCAGAGTGCCCAACTTAATGCTGGCAACTGATAA  
123 TAAGGGTTGCGCTCGTTGCGGGACTTAACCCAACATCTCACGACACGAGCTGACGAC  
124 AACCATGCACCACCTGTATCCATGTCCCCGAAGGGAACGTCTAATCTCTTAGATTTAC  
125 ATAGTATGTCAAGACCTGGTAAGGTTCTTCGCGTAGCTTCGAATTAACCACATGCTC

126 CACCGCTTGTGCGGGCCCCCGTCAATTCCTTTGAGTTTCAGCCTTGCGGCCGTACTCC  
127 CCAGGCGGAATGCTTAATGCGTTAGCTGCAGCACTGAAGGGCGGAAACCCTCCAACA  
128 CTTAGCATTATCGTTTACGGTATGGACTACCAGGGTATCTAATCCTGTTTGCTACCC  
129 AACTTTTCGAGCCTCAGCGTCAGTTACAGACCAGACAGCCGCCTTCGCCACTGGTGTT  
130 CTTCATATATCTACGCATTTACCGCTACACATGGAGTTCCACTGTCCTCTTCTGCAC  
131 TCAAGTTTCCCAGTTTCCGATGCACTTCTTCGGTTGAGCCGAAGGCTTTCACATCAGA  
132 CTAAAAAACCGCCTGCGCTCGCTTTACGCCAATAAATCCGGACAACGCTTGCCACC  
133 TACGTATTACCGCGGCTGCTGGCAGTAGTTAGCCGTGGCTTTCTGGTTAAATACCGT  
134 CAATACCTGAACAGTTACTCTCAGATATGTTCTTCTTTAACAACAGAGTTTACGAGC  
135 CGAAACCCTTCTTCACTCACGCGGCGTTGCTCCATCAGACTTTCGTCCATTGTGGAAG  
136 ATTCCCTACTGCTGCCTCCCGTAGGAGTTTGGGCCGTGTCTCAGTCCCAATGTGGCCG  
137 ATTACCCTCTCAGGTCGGCTACGTATCATTGCCATGGTGAGCCGTTACCTCACCATCT  
138 AGCTAATACGCCGCGGGACCATCCAGAAGTGATAGCCGAAGCCATCTTCAAACCTCG  
139 GACCATGCGGTCCAAGTTGTTATGCGGTATTAGCATCTGTTTCCAGGTGTTATCCCC  
140 GCTTCTGGGCAGGTTTCCCACGTGTTACTCACCAGTTCGCCACTCACTCAAATGTAAA  
141 TCATGATGCAAGCACC AATCAATACCAGAGTTCGTTTCGACTGC  
142 *Lp. plantarum* 25L4 (Preservation number: FCQHC25L4)  
143 GGCTGGTTCCTAAAAGGTTACCCACCGACTTTGGGTGTTACAACTCTCATGGTGTG  
144 ACGGGCGGTGTGTACAAGGCCCGGGAACGTATTCACCGCGGCATGCTGATCCGCGAT  
145 TACTAGCGATTCCGACTTCATGTAGGCGAGTTGCAGCCTACAATCCGAACTGAGAAT  
146 GGCTTTAAGAGATTAGCTTACTCTCGCGAGTTCGCAACTCGTTGTACCATCCATTGTA  
147 GCACGTGTGTAGCCCAGGTCATAAGGGGCATGATGATTTGACGTCATCCCCACCTTCC  
148 TCCGTTTGTACCGGCAGTCTCACCAGAGTGCCCAACTTAATGCTGGCAACTGATAA  
149 TAAG  
150 GGTTGCGCTCGTTGCGGGACTTAACCCAACATCTCACGACACGAGCTGACGACAACC  
151 ATGCACCACCTGTATCCATGTCCCCGAAGGGAACGTCTAATCTCTTAGATTTGCATAG  
152 TATGTCAAGACCTGGTAAGGTTCTTCGCGTAGCTTCGAATTAACCACATGCTCCACC  
153 GCTTGTGCGGGCCCCCGTCAATTCCTTTGAGTTTCAGCCTTGCGGCCGTACTCCCCAG  
154 GCGGAATGCTTAATGCGTTAGCTGCAGCACTGAAGGGCGGAAACCCTCCAACACTTA  
155 GCATTCATCGTTTACGGTATGGACTACCAGGGTATCTAATCCTGTTTGCTACCCATAC

156 TTTCGAGCCTCAGCGTCAGTTACAGACCAGACAGCCGCCTTCGCCACTGGTGTCTTC  
157 CATATATCTACGCATTTACCGCTACACATGGAGTTCCACTGTCTCTTCTGCACTCAA  
158 GTTCCCAGTTTCCGATGCACTTCTTCGGTTGAGCCGAAGGCTTTCACATCAGACTTA  
159 AAAAACCGCCTGCGCTCGCTTTACGCCAATAAATCCGGACAACGCTTGCCACCTAC  
160 GTATTACCGCGGCTGCTGGCACGTAGTTAGCCGTGGCTTTCTGGTTAAATACCGTCAA  
161 TACCTGAACAGTTACTCTCAGATATGTTCTTCTTAAACAACAGAGTTTTACGAGCCGA  
162 AACCTTCTTCACTCACGCGGCGTTGCTCCATCAGACTTTCGTCCATTGTGGAAGATT  
163 CCCTACTGCTGCCTCCCGTAGGAGTTTGGGCCGTGTCTCAGTCCCAATGTGGCCGATT  
164 ACCCTCTCAGGTGCGCTACGTATCATTGCCATGGTGAGCCGTTACCCACCATCTAGC  
165 TAATACGCCGCGGGACCATCCAAAAGTGATAGCCGAAGCCATCTTCAAGCTCGGAC  
166 CATGCGGTCCAAGTTGTTATGCGGTATTAGCATCTGTTTCCAGGTGTTATCCCCGCTT  
167 CTGGGCAGGTTTCCACGTGTTACTCACCAGTTCGCCACTCACTCAAATGTAAATCAT  
168 GATGCAAGCACCAATCAATACCAGAGTTCGTTCGACTTG

169 *Lp. plantarum* 61M2 (Preservation number: FZJTZ76L161M2)

170 GCTGGTTCCTAAAAGGTTACCCACCGACTTTGGGTGTTACAACTCTCATGGTGTGA  
171 CGGGCGGTGTGTACAAGGCCCGGGAACGTATTCACCGCGGCATGCTGATCCGCGATT  
172 ACTAGCGATTCCGACTTCATGTAGGCGAGTTGCAGCCTACAATCCGAACTGAGAATG  
173 GCTTTAAGAGATTAGCTTACTCTCGCGAGTTCGCAACTCGTTGTACCATCCATTGTAG  
174 CACGTGTGTAGCCAGGTCATAAGGGGCATGATGATTTGACGTCATCCCCACCTTCT  
175 CCGGTTTGTACCGGCAGTCTCACCAGAGTGCCCAACTTAATGCTGGCAACTGATAAT  
176 AAGGGTTGCGCTCGTTGCGGGACTTAACCCAACATCTCACGACACGAGCTGACGACA  
177 ACCATGCACCACCTGTATCCATGTCCCCGAAGGGAACGTCTAATCTCTTAGATTGCA  
178 TAGTATGTCAAGACCTGGTAAGGTTCTTCGCGTAGCTTCGAATTAACCACATGCTCC  
179 ACCGCTTGTGCGGGCCCCGTCAATTCCTTTGAGTTTCAGCCTTGCGGCCGTACTCCC  
180 CAGGCGGAATGCTTAATGCGTTAGCTGCAGCACTGAAGGGCGGAAACCCTCCAACAC  
181 TTAGCATTCATCGTTTACGGTATGGACTACCAGGGTATCTAATCCTGTTTGCTACCCAT  
182 ACTTTCGAGCCTCAGCGTCAGTTACAGACCAGACAGCCGCCTTCGCCACTGGTGTCT  
183 TCCATATATCTACGCATTTACCGCTACACATGGAGTTCCACTGTCTCTTCTGCACTC  
184 AAGTTTCCCAGTTTCCGATGCACTTCTTCGGTTGAGCCGAAGGCTTTCACATCAGACT  
185 TAAAAACCGCCTGCGCTCGCTTTACGCCAATAAATCCGGACAACGCTTGCCACCTA



186 CGTATTACCGCGGCTGCTGGCACGTAGTTAGCCGTGGCTTTCTGGTTAAATACCGTCA  
187 ATACCTGAACAGTTACTCTCAGATATGTTCTTCTTTAACAACAGAGTTTTACGAGCCG  
188 AAACCCTTCTTCACTCACGCGGCGTTGCTCCATCAGACTTTCGTCCATTGTGGAAGAT  
189 TCCCTACTGCTGCCTCCCGTAGGAGTTTGGGCCGTGTCTCAGTCCCAATGTGGCCGAT  
190 TACCCTCTCAGGTCGGCTACGTATCATTGCCATGGTGAGCCGTTACCCCACCATCTAG  
191 CTAATACGCCGCGGGACCATCCAAAAGTGATAGCCGAAGCCATCTTTCAAGCTCGGA  
192 CCATGCGGTCCAAGTTGTTATGCGGTATTAGCATCTGTTTCCAGGTGTTATCCCCCGCT  
193 TCTGGGCAGGTTTCCCACGTGTTACTCACCAGTTCTCCACTCACTCAAATGTAAATCA  
194 TGATGCAAGCACCAATCAATACCAGAGTTCGTTTCGACTT
